# Supplementary material
Source: HighWire-hosted journal article supplement (https://jnm.snmjournals.org/highwire/filestream/94124/field_highwire_adjunct_files/0/jnm080408_Suppl_figures.pdf)
Supplement: jnm080408_Suppl_figures.pdf [file jnm080408_Suppl_figures.pdf]

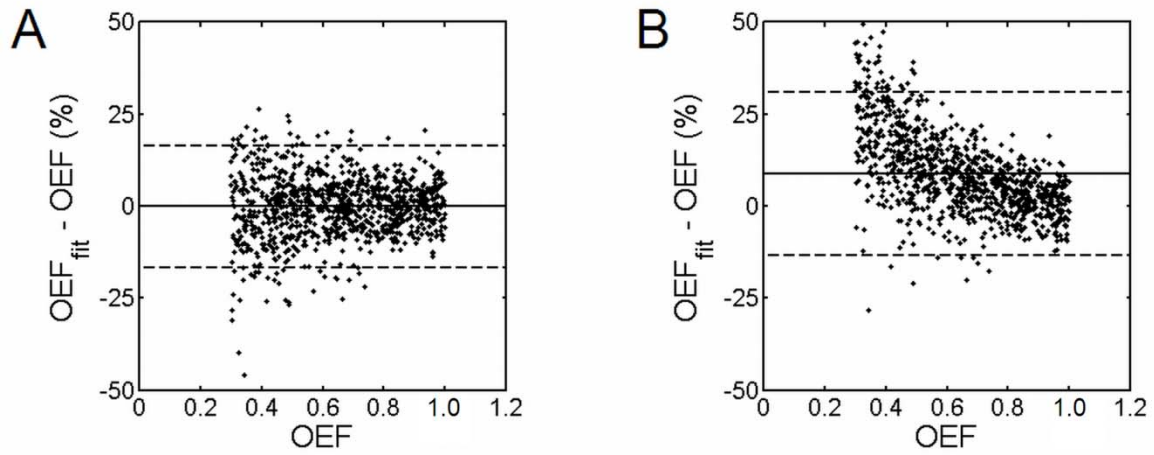

Supplemental Figure 1. Simulation study: percentage deviation between fitted and simulated OEF values for models 2 (A) and 2' (B).

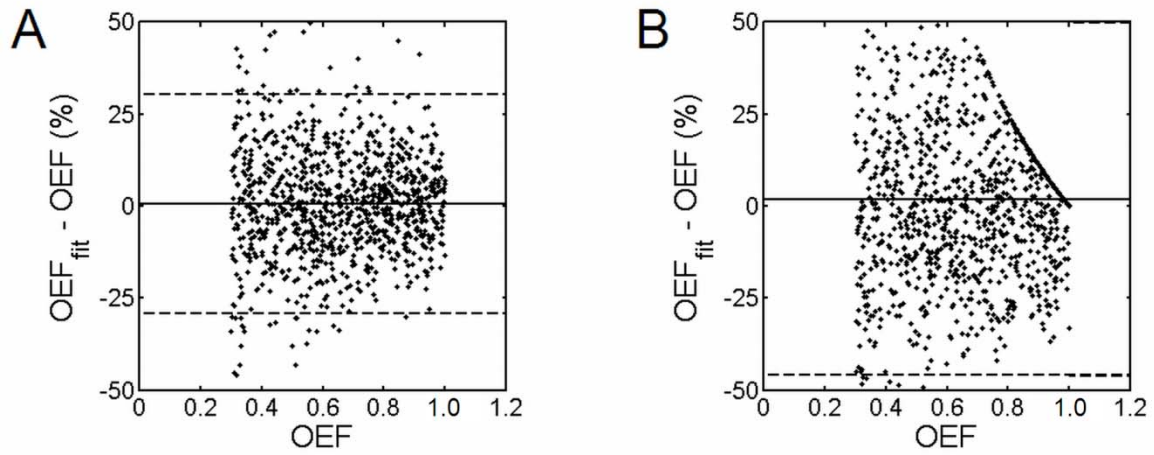

Supplemental Figure 2. Simulation study: percentage deviation between fitted and simulated OEF values for models 2 (A) and 8 (B), in case of small movements between  $^{15}\text{O}$ -water and  $^{15}\text{O}_2$  scans.
